# Supplementary material for: Characteristic of molecular subtypes based on PANoptosis-related genes and experimental verification of hepatocellular carcinoma
Source: publisher site journal article supplement (doi:10.18632/aging.204720), 2023-05-12
Supplement: Supplementary file [file aging-v15i10-204720-supplementary-material-SD1.pdf]

SUPPLEMENTARY FIGURES

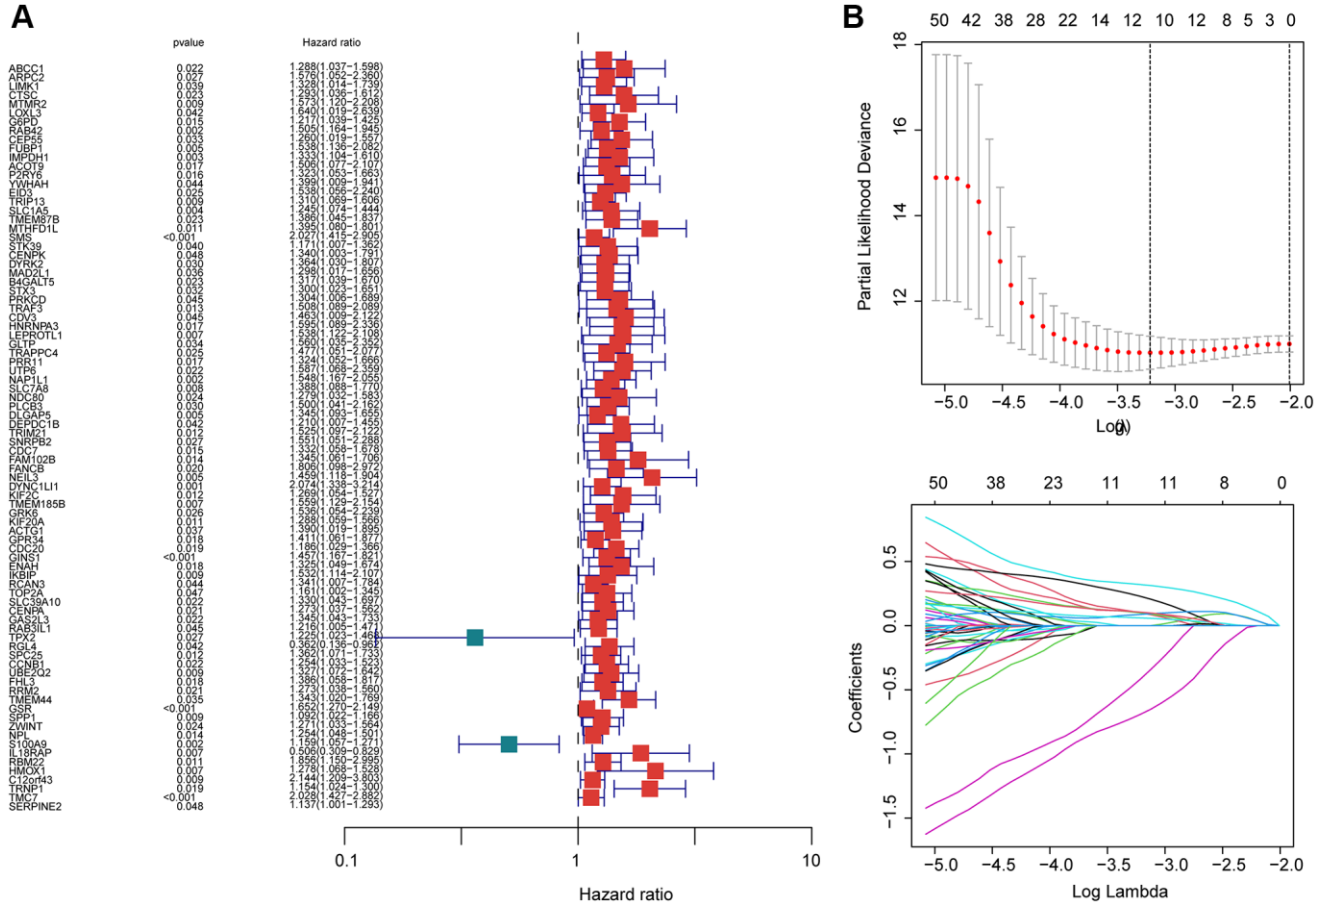

Supplementary Figure 1. The LASSO-univariate Cox algorithm of 376 DEGs. (A) Univariate Cox analysis of DEGs. (B) Identification of feature prognostic DEGs based on LASSO model.

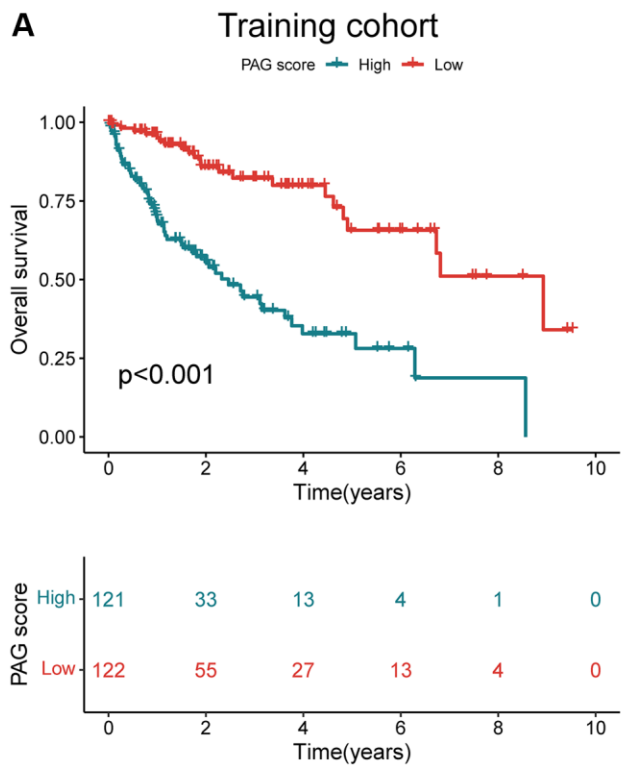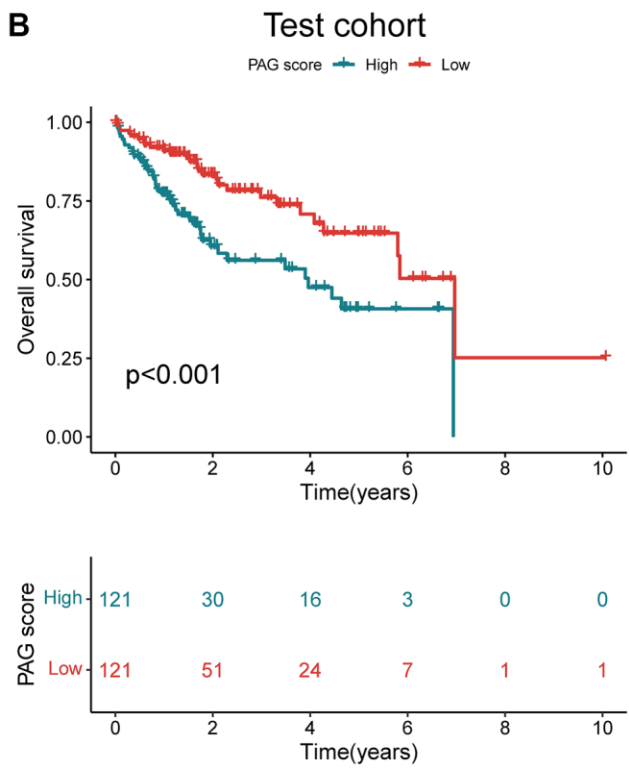

**Supplementary Figure 2. Development of risk model based on the PAG score in the training and test cohorts.** The clinical prognostic analysis of HCC samples with low- and high PAG score in the (A) training and (B) Test cohorts.
